# Supplementary material for: Impact of climate change on the transition of Neanderthals to modern humans in Europe
Source: PubMed Central journal article supplement — Proc Natl Acad Sci U S A. 2018 Aug 27;115(37):9116–21. doi: 10.1073/pnas.1808647115 (PMC6140518; doi:10.1073/pnas.1808647115), 2018-08-27
Supplement: pnas.1808647115.sapp.pdf [file pnas.1808647115.sapp.pdf]

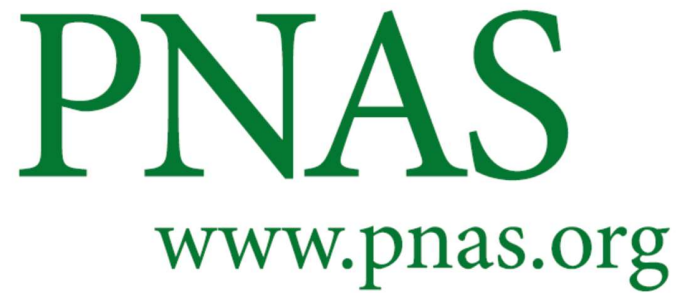

## Supplementary Information for

The impact of climate change on the transition of Neanderthals to modern humans in Europe

Michael Staubwasser, Virgil Drăgușin, Bogdan P. Onac, Sergey Assonov, Vasile Ersek, Dirk L. Hoffmann, Daniel Veres

Michael Staubwasser

Email: [m.staubwasser@uni-koeln.de](mailto:m.staubwasser@uni-koeln.de)

### **This PDF file includes:**

Supplementary text  
Figs. S1 to S4  
Tables S1 to S2  
References for SI reference citations

### **Other supplementary materials for this manuscript include the following:**

Datasets S1

## Supplementary Information Text

### Materials and Methods.

Figure S1 shows the location of paleoclimate and environmental records used for comparison, in addition to archaeological sites discussed in the text. The two speleothems presented in this study are from two sites in the East and South Carpathians. Tăușoare Cave (TC) is situated in the Rodnei Mountains of the East Carpathians, northern Romania (47° 26' N, 24° 31' E), at an altitude of 950 m. The cave has a surveyed length of over 8.5 km and is 329 m deep and hosts an abundance of gypsum crusts and flowers along with the presence of various mixed cation sulfates (1, 2). Sulfate derives from weathering of pyrite present in the calcite and bituminous sediments. The process provides significant acidity for calcite dissolution in this cave. Thus, the isotopic composition of the host-rock calcite rather than soil CO<sub>2</sub> dominates the δ<sup>13</sup>C record of TC speleothems. Stalagmite 1152 was retrieved from the “Dining Room” at about 625 m from and about 190 m below the entrance. It is 27 cm long and is made of dark-brown dense calcite (Fig. S2). The growth axis of stalagmite T-1152 is stable for the first 23 cm and changes direction for the last 4 cm. Ascunsă Cave (AC) is situated in the Mehedinți Mountains, South Carpathians, southwestern Romania, at an altitude of 1050 m (45° 00' N, 22° 36' E). The cave is 400 m long and over 200 m deep, formed mostly on the contact between Barremian-Aptian limestone and Turonian-Senonian wildflysch (melange) (3). Stalagmite POM1 was retrieved from the “White Chamber”, at about 80 m from the entrance. It is ~30 cm long and composed of alternations of dense dark calcite and lighter, less dense calcite (Fig. S2). The growth axis presents several slight direction changes.

For U-Th dating, samples were drilled parallel to growth layers. U and Th were analyzed by MC-ICP-MS (Neptune+, Thermo) after adding a <sup>229</sup>Th – <sup>236</sup>U double spike and subsequent ion-exchange chromatographic separation of U and Th from the sample matrix (4) (Tab. S1). A detrital Th-correction was applied assuming the average crustal <sup>232</sup>Th/<sup>238</sup>U activity ratio of 1,250 ± 0.625. Detrital <sup>230</sup>Th correction amounts to within 50 – 350 years for the AC-speleothem, and 10 – 260 years for the TC-speleothem. The final chronology was modeled using the STALAGE software package (5). Results can be found in Dataset S1.

For stable C and O isotope ratios samples were drilled continuously at 250 μm (TC) and at 300 μm (AC) resolution and analyzed by gas-IRMS (Thermo 253, and Thermo Delta+) at the University of Cologne and (TC) and the University of South Florida (AC). Results can be found in Dataset S1. The commonly applied ‘Hendy-Test’ to exclude kinetic domination of isotope fractionation was not performed. Both speleothems show relatively low growth rates and poor resolution of growth layering at the 250 - 300 μm sampling resolution level. The criterion of the Hendy-Test is to look for covariance of δ<sup>13</sup>C and δ<sup>18</sup>O within the same growth layer, which may hint at potential kinetically dominated isotope fractionation as a result e.g. of rapid degassing or rapid calcite precipitation. Because the two speleothems generally show little covariance between δ<sup>13</sup>C and δ<sup>18</sup>O overall, the criterion to meet the Hendy-Test is essentially fulfilled. In addition, cave monitoring water isotope data (δD, δ<sup>18</sup>O) suggests that oxygen isotopes fractionate at equilibrium between drip water and calcite, and carbon isotopes may at the worst contain a kinetic fractionation of 1.0 - 1.5 ‰ (6).

Regarding the association of the TC-stalagmite’s pronounced low δ<sup>18</sup>O interval between ~ 40.7 and 39.7 ka with GS-10 (between 40.8 and 40.2 ka in the GICC05 chronology) (5), as opposed to an association with GS-9 – H4 (between 39.9 and 38.2 ka in the GICC05 chronology), it is worthwhile to assess potential chronologic inaccuracy due to the correction for detrital Th. The onset of the low δ<sup>18</sup>O has been dated directly to 40.66 ± 0.47 ka (40.92 ± 0.47 ka without detrital Th correction) (Tab. S1). An activity ratio for <sup>230</sup>Th/<sup>232</sup>Th of 101 suggests a small detrital contribution – amounting to an age correction of ~ 260 years. However, detrital <sup>230</sup>Th just

amounts to ~0.5% of the total measured  $^{230}\text{Th}$  activity based on the average crustal Th/U activity ratio (1.20) for a detrital contamination. To bring the resulting 40.7 ka onset age in line with the 39.9 ka BP onset age of GS-9 – H4 would require a low detrital Th/U ratio of less than 0.4, well outside the lower boundary for crustal Th/U of 0.625 and unusual for the given setting.

### The Ascunsă Cave $\delta^{18}\text{O}$ record

Stable O-isotopes combine information on temperature and a number of hydrologic aspects that may be constrained by data comparison in regional and temporal context. Throughout the Holocene, the amplitude of  $\delta^{18}\text{O}$  variability in the western Mediterranean, the Alps, and northern Romania – including TC – was significantly lower (~ 0.5 ‰) than in the eastern Mediterranean and southern Romania – including AC (7). An even larger amplitude difference between the AC- $\delta^{18}\text{O}$  and the TC- $\delta^{18}\text{O}$  existed during MIS-3. (Fig. S3). This cannot be explained by a different temperature regime alone (see main article) but must reflect a significant hydroclimatic contribution to the AC speleothem  $\delta^{18}\text{O}$  records. The pacing of  $\delta^{18}\text{O}$  is very different between AC and TC, and between AC and Greenland temperatures (8, 9). Thus, it is unlikely, that the two speleothems were inside the same hydrologic regime but record latitudinal differences in rain-out history from the same source. However, there is a similar structure between AC- $\delta^{18}\text{O}$  record and eastern Mediterranean marine and speleothem records (Fig. S4) (10). This pattern-similarity between the AC- $\delta^{18}\text{O}$  record and the eastern Mediterranean is observed only when the AC-stalagmite's  $\delta^{18}\text{O}$  record is plotted with an inverted scale relative to the speleothem record from the Levant (Fig. S4). Numeric climate simulations of the last glacial (11) demonstrate the underlying causality for this apparent inverse correlation between the East Carpathians and the Eastern Mediterranean. All simulated modes of atmospheric circulation patterns that contributed to the average glacial precipitation over European and the Mediterranean show seasonal precipitation anomalies of opposite sign between the eastern Mediterranean and east-central Europe. This synoptic-scale relationship is corroborated by a similar relationship between the speleothems of AC and Karaca Cave (12), eastern Turkey.

Interstadial GI-7 stands out in the AC- $\delta^{18}\text{O}$  record with an anomalous isotope event (Fig. S3), a minimum more than 1 ‰ lower than all other features in the record. It is also a prominent feature in the speleothem and marine records from the eastern Mediterranean (Fig. S4). This could suggest that supply and influence of Mediterranean moisture in the region of the South Carpathians was highly variable between interstadials. Although the loess record of the Danube Valley appears to confirm this observation within given chronologic uncertainty (13), there is, however, no apparent explanation available as to the cause of this moist interval during GI-7.

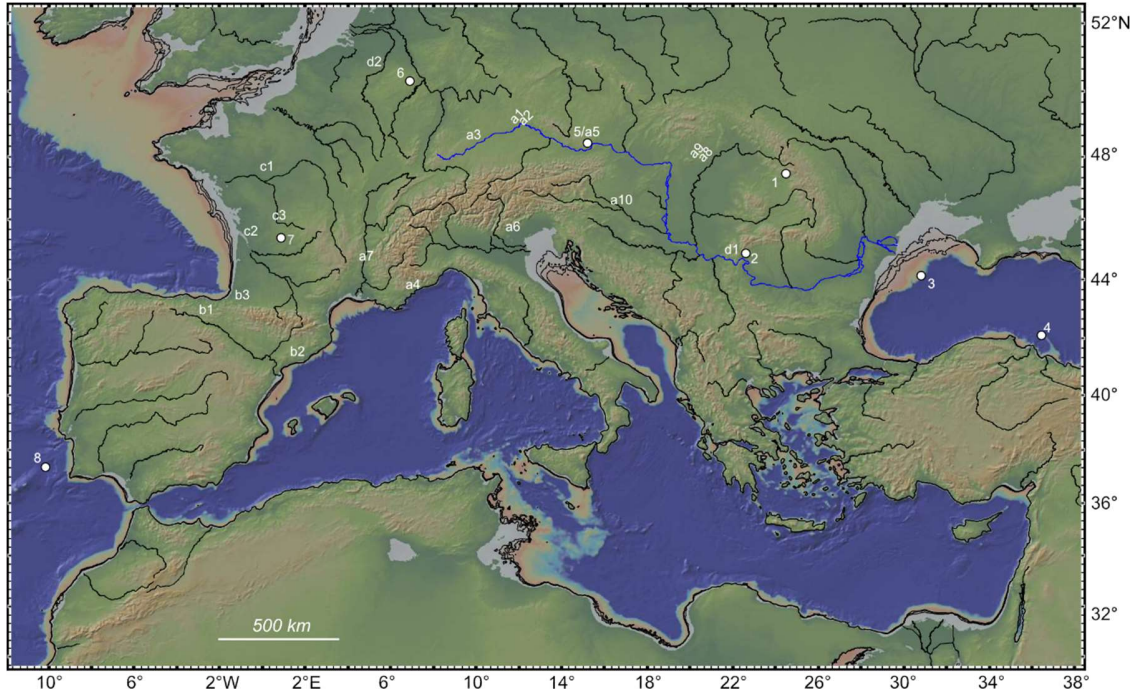

**Fig. S1.** Map of the southern and central Europe with rivers (blue: the Danube), coastlines for sea level 40 m and 60 m lower than at present, and sites discussed in the main text. Geologic records (dots): (1) Tăușoare Cave; (2) Ascunsă Cave; (3) core MD04-2790; (4) core M72/5-25-GC1; (5) Willendorf-II paleosol/loess profile; (6) Eifel Maar Lakes; (7) Villars Cave; (8) core MD95-2042. Archeologic sites: (a1) Sesselfelsgrotte; (a2) Keilberg-Kirche; (a3) Geissenklösterle; (a4) Riparo Mochi; (a5) Willendorf-II; (a6) Grotta di Fumane; (a7) Grotte Mandrin; (a8) Pes-kő Cave; (a9) Szeleta Cave; (a10) Vindija Cave; (b1) Labeko Koba; (b2) Abric Romani; (b3) Isturitz; (c1) Grotte du Renne; (c2) Les Cottés; (c3) Saint Césaire; (d1) Oase Cave; (d2) Goyet Cave. The map was generated with the GeoMapApp software, <http://www.geomapapp.org> (14).

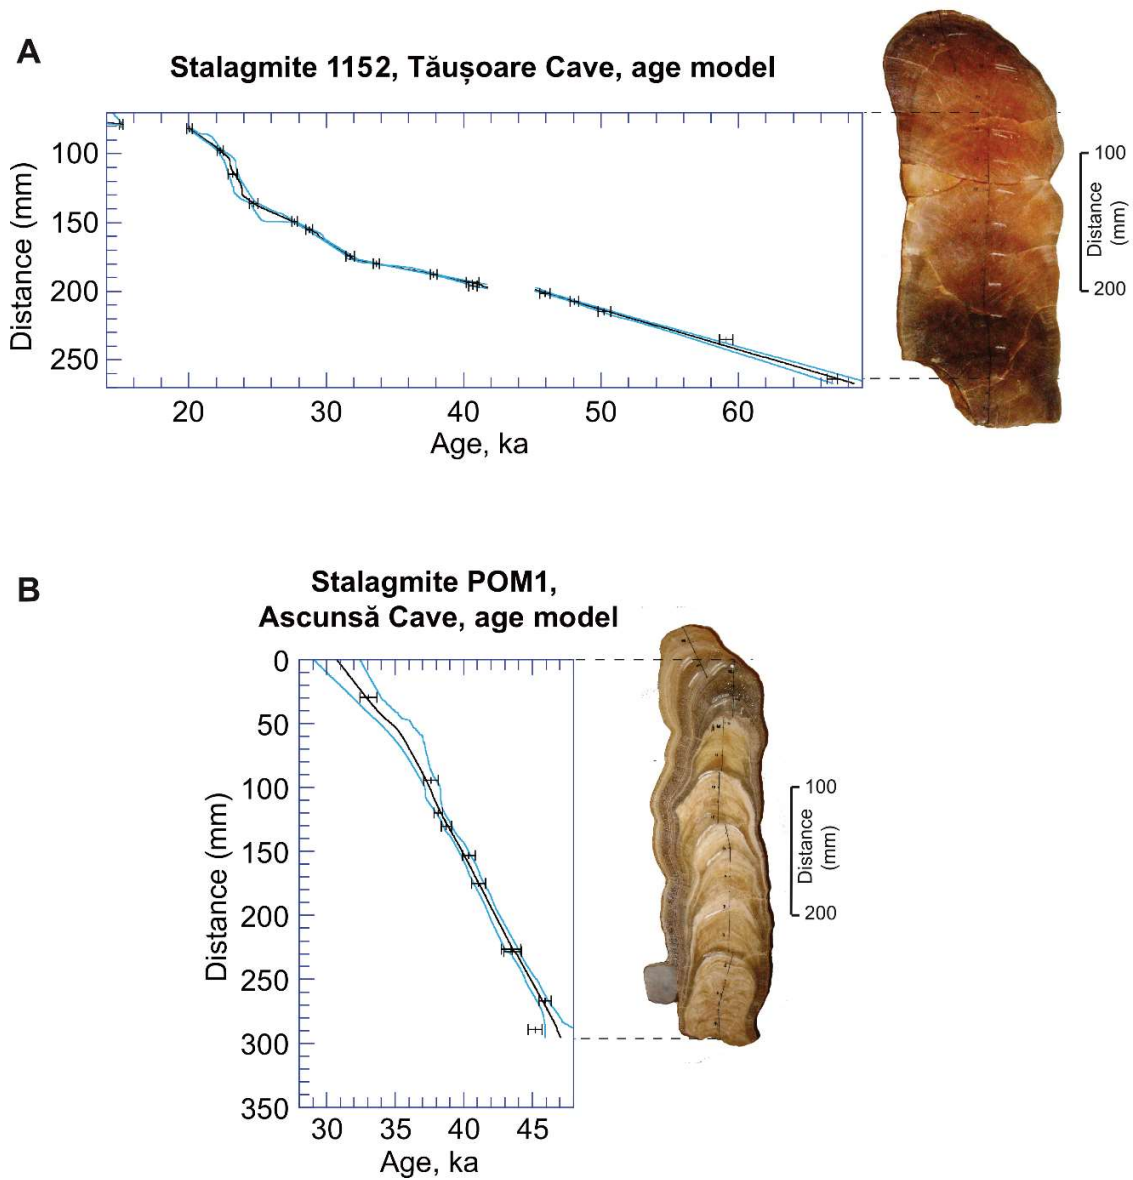

**Fig. S2.** U-Th age models and photographs of a) stalagmite 1152, Tăușoare Cave, and b) stalagmite POM1, Ascunsă Cave.

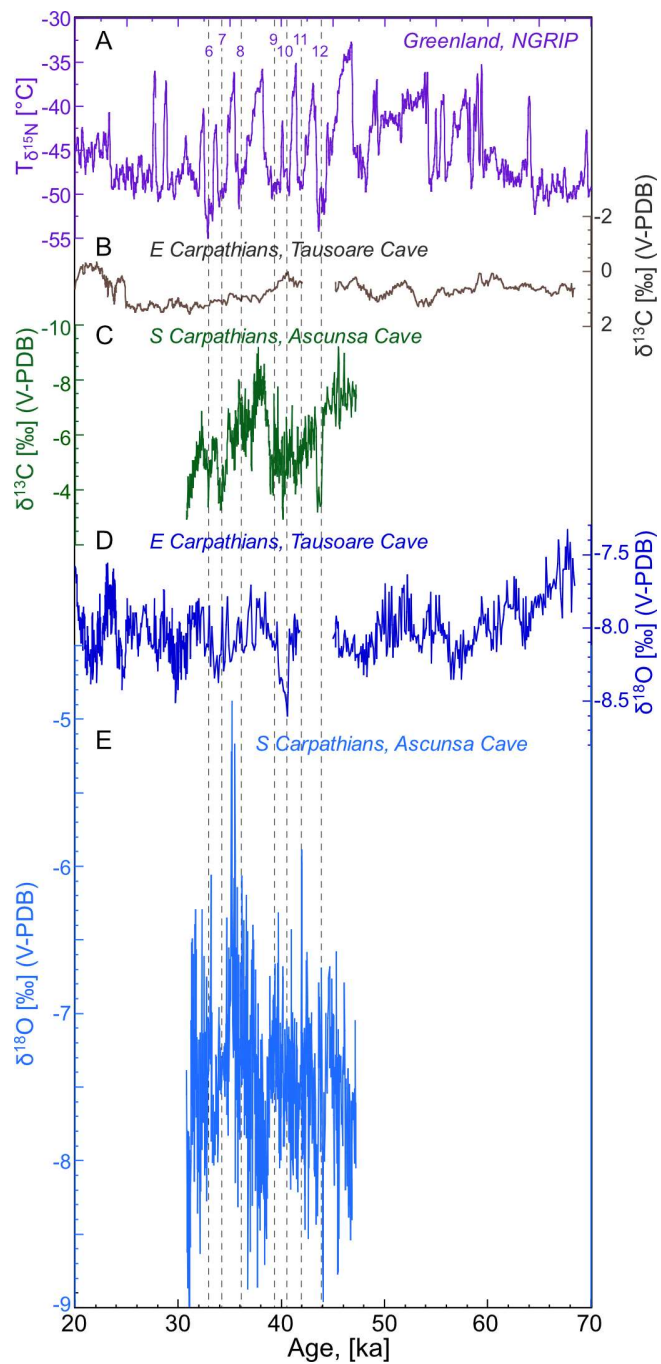

**Fig. S3.** A: Greenland NGRIP ice core temperatures on the GICC05 time scale with numbered interstadials (8). B:  $\delta^{13}\text{C}$  of stalagmite 1152 from Tăușoare Cave. C:  $\delta^{13}\text{C}$  of stalagmite POM1 from Ascunsa Cave. D:  $\delta^{18}\text{O}$  of stalagmite 1152 from Tăușoare Cave. E:  $\delta^{18}\text{O}$  of stalagmite POM1 from Ascunsa Cave.

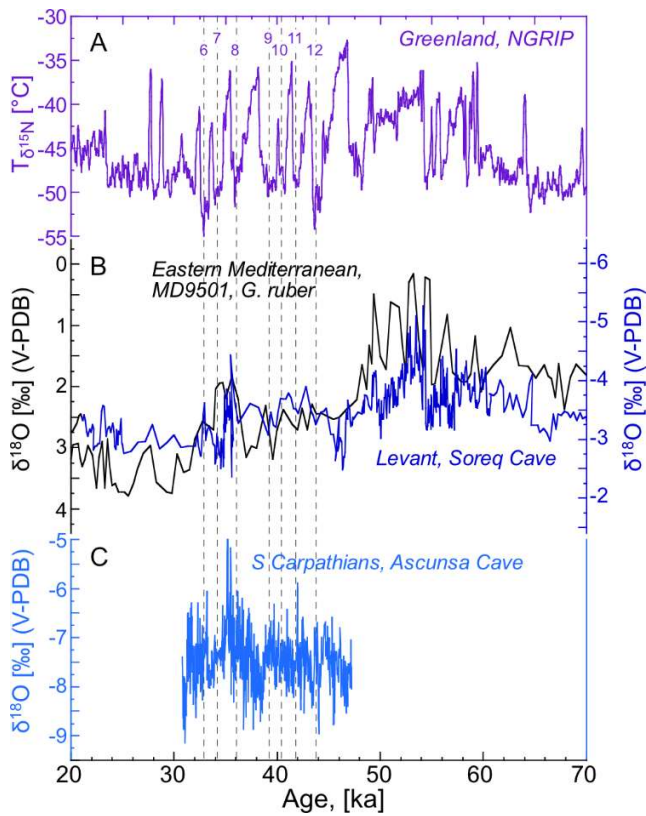

**Fig. S4.** A: Greenland NGRIP ice core temperatures on the GICC05 time scale with numbered interstadials (8). B: Eastern Mediterranean and Levantine records (10):  $\delta^{18}O$  data of planktonic foraminifera (*G. ruber*) from eastern Mediterranean marine sediment core MD9501, and  $\delta^{18}O$  data of a stalagmite from Soreq cave (Israel). C:  $\delta^{18}O$  data of stalagmite POM1 from Ascunsa Cave. Note that the scale for the two stalagmites is inverted with respect to each other.

**Table S1.** U-Th data for stalagmites POM1, Ascunsă Cave, and 1152, Tăușoare Cave. Corrected values include detrital Th correction.

| Sample       | Distance (mm) | <sup>238</sup> U (ng/g) | ±    | <sup>232</sup> Th (ng/g) | ±     | ( <sup>230</sup> Th/ <sup>232</sup> Th) activity ratio | ±     | ( <sup>230</sup> Th/ <sup>238</sup> U) activity ratio | ±      | ( <sup>234</sup> U/ <sup>238</sup> U) activity ratio | ±      | uncorrected age (ka) | ±    | corrected age (ka) | ±    | ( <sup>234</sup> U/ <sup>238</sup> U) initial activity ratio | ±      | Comments                 |
|--------------|---------------|-------------------------|------|--------------------------|-------|--------------------------------------------------------|-------|-------------------------------------------------------|--------|------------------------------------------------------|--------|----------------------|------|--------------------|------|--------------------------------------------------------------|--------|--------------------------|
| 1152 top     | 0,50          | 1019,5                  | 6,6  | 3,442                    | 0,034 | 6,31                                                   | 0,15  | 0,0070                                                | 0,0002 | 1,4296                                               | 0,0024 | 0,53                 | 0,01 | 0,47               | 0,04 | 1,4305                                                       | 0,0024 |                          |
| 1152 / XIII  | 16,25         | 963,1                   | 34,4 | 3,054                    | 0,467 | 97,29                                                  | 1,28  | 0,1009                                                | 0,0038 | 1,4464                                               | 0,0033 | 7,87                 | 0,30 | 7,81               | 0,30 | 1,4567                                                       | 0,0034 |                          |
| 1153 / XII   | 37,38         | 1304,6                  | 50,9 | 2,486                    | 0,125 | 235,37                                                 | 2,60  | 0,1468                                                | 0,0013 | 1,5133                                               | 0,0035 | 11,08                | 0,10 | 11,04              | 0,11 | 1,5298                                                       | 0,0036 |                          |
| 1152 / XI    | 38,88         | 1231,0                  | 40,9 | 1,438                    | 0,054 | 404,15                                                 | 5,16  | 0,1545                                                | 0,0016 | 1,5394                                               | 0,0039 | 11,48                | 0,13 | 11,46              | 0,13 | 1,5573                                                       | 0,0040 |                          |
| 1152 / X     | 78,50         | 2632,7                  | 73,8 | 1,672                    | 0,062 | 1069,73                                                | 15,75 | 0,2223                                                | 0,0019 | 1,7095                                               | 0,0036 | 15,07                | 0,14 | 15,06              | 0,14 | 1,7405                                                       | 0,0037 |                          |
| 1152 / IX    | 81,50         | 952,4                   | 28,6 | 2,950                    | 0,101 | 306,65                                                 | 2,91  | 0,3108                                                | 0,0027 | 1,8252                                               | 0,0044 | 20,10                | 0,19 | 20,06              | 0,20 | 1,8740                                                       | 0,0045 |                          |
| 1152 / VIII  | 97,63         | 1854,4                  | 70,8 | 3,301                    | 0,259 | 578,76                                                 | 7,41  | 0,3371                                                | 0,0028 | 1,7996                                               | 0,0060 | 22,31                | 0,22 | 22,28              | 0,22 | 1,8520                                                       | 0,0062 |                          |
| 1152 / VII   | 114,88        | 1674,3                  | 61,1 | 1,603                    | 0,552 | 1061,09                                                | 7,72  | 0,3323                                                | 0,0045 | 1,7126                                               | 0,0029 | 23,21                | 0,35 | 23,20              | 0,35 | 1,7610                                                       | 0,0031 |                          |
| 1152 / VI    | 135,88        | 942,6                   | 33,0 | 1,656                    | 0,279 | 583,06                                                 | 4,91  | 0,3352                                                | 0,0034 | 1,6309                                               | 0,0050 | 24,75                | 0,29 | 24,72              | 0,29 | 1,6769                                                       | 0,0052 |                          |
| 1152 XXII    | 149,63        | 1086,5                  | 53,1 | 1,051                    | 0,054 | 1161,09                                                | 11,40 | 0,3674                                                | 0,0025 | 1,6158                                               | 0,0034 | 27,71                | 0,22 | 27,69              | 0,22 | 1,6661                                                       | 0,0036 |                          |
| 1152 / V     | 155,00        | 1397,5                  | 39,1 | 1,318                    | 0,040 | 1151,27                                                | 11,89 | 0,3552                                                | 0,0024 | 1,5133                                               | 0,0037 | 28,77                | 0,24 | 28,75              | 0,24 | 1,5568                                                       | 0,0039 |                          |
| 1152 / IV    | 174,63        | 931,3                   | 30,0 | 2,383                    | 0,085 | 472,40                                                 | 4,68  | 0,3955                                                | 0,0031 | 1,5418                                               | 0,0034 | 31,80                | 0,30 | 31,75              | 0,30 | 1,5931                                                       | 0,0037 |                          |
| 1152 XVII    | 179,88        | 802,2                   | 16,3 | 1,246                    | 0,047 | 802,42                                                 | 22,17 | 0,4078                                                | 0,0022 | 1,5125                                               | 0,0031 | 33,68                | 0,22 | 33,65              | 0,22 | 1,5639                                                       | 0,0033 |                          |
| 1152 XVI     | 187,88        | 612,2                   | 13,9 | 3,442                    | 0,122 | 243,85                                                 | 6,17  | 0,4486                                                | 0,0023 | 1,5034                                               | 0,0033 | 37,91                | 0,25 | 37,80              | 0,25 | 1,5610                                                       | 0,0035 |                          |
| 1152 / III   | 193,63        | 517,7                   | 21,8 | 7,404                    | 0,315 | 101,37                                                 | 1,00  | 0,4744                                                | 0,0041 | 1,4903                                               | 0,0049 | 40,92                | 0,45 | 40,66              | 0,47 | 1,5521                                                       | 0,0054 |                          |
| 1152 XXI     | 196,25        | 506,4                   | 12,8 | 3,987                    | 0,106 | 188,71                                                 | 1,28  | 0,4862                                                | 0,0029 | 1,5296                                               | 0,0031 | 40,81                | 0,31 | 40,67              | 0,31 | 1,5953                                                       | 0,0034 |                          |
| 1152 XV      | 201,25        | 566,7                   | 14,1 | 3,243                    | 0,093 | 269,37                                                 | 3,24  | 0,5044                                                | 0,0031 | 1,4390                                               | 0,0033 | 46,02                | 0,37 | 45,91              | 0,37 | 1,5006                                                       | 0,0036 |                          |
| 1152 XIV     | 207,25        | 639,8                   | 12,8 | 2,372                    | 0,052 | 433,22                                                 | 3,25  | 0,5255                                                | 0,0023 | 1,4452                                               | 0,0030 | 48,12                | 0,29 | 48,05              | 0,29 | 1,5105                                                       | 0,0033 |                          |
| 1152 / II    | 215,00        | 570,5                   | 16,6 | 3,212                    | 0,100 | 292,59                                                 | 2,68  | 0,5389                                                | 0,0039 | 1,4293                                               | 0,0040 | 50,36                | 0,48 | 50,25              | 0,49 | 1,4955                                                       | 0,0044 |                          |
| 1152 / I     | 234,88        | 1182,4                  | 38,7 | 6,035                    | 0,229 | 360,50                                                 | 2,83  | 0,6021                                                | 0,0035 | 1,4059                                               | 0,0034 | 59,21                | 0,49 | 59,11              | 0,49 | 1,4803                                                       | 0,0038 |                          |
| 1152 / base  | 264,00        | 622,8                   | 3,5  | 5,433                    | 0,033 | 225,32                                                 | 0,50  | 0,6432                                                | 0,0023 | 1,3694                                               | 0,0027 | 66,98                | 0,37 | 66,81              | 0,38 | 1,4472                                                       | 0,0031 |                          |
| POM 1 / top  |               | 32,5                    | 0,2  | 0,576                    | 0,005 | 22,93                                                  | 0,51  | 0,1331                                                | 0,0031 | 1,2610                                               | 0,0040 | 12,14                | 0,30 | 11,74              | 0,36 | 1,2710                                                       | 0,0041 | outside measured profile |
| POM 1 / III  | 29,67         | 38,1                    | 0,2  | 1,923                    | 0,017 | 20,95                                                  | 0,18  | 0,3460                                                | 0,0028 | 1,2746                                               | 0,0032 | 34,18                | 0,34 | 33,07              | 0,61 | 1,3055                                                       | 0,0040 |                          |
| POM1/X       | 94,33         | 45,2                    | 0,3  | 0,164                    | 0,005 | 292,85                                                 | 3,83  | 0,3472                                                | 0,0040 | 1,1799                                               | 0,0044 | 37,69                | 0,54 | 37,61              | 0,54 | 1,2003                                                       | 0,0048 |                          |
| POM 1 / V    | 119,67        | 84,8                    | 0,4  | 0,620                    | 0,006 | 140,69                                                 | 1,06  | 0,3366                                                | 0,0021 | 1,1306                                               | 0,0027 | 38,32                | 0,31 | 38,14              | 0,32 | 1,1457                                                       | 0,0030 |                          |
| POM1/VIII    | 130,33        | 70,1                    | 0,4  | 0,183                    | 0,006 | 422,27                                                 | 5,43  | 0,3602                                                | 0,0027 | 1,1942                                               | 0,0036 | 38,79                | 0,38 | 38,73              | 0,38 | 1,2168                                                       | 0,0039 |                          |
| POM1/VII     | 153,33        | 37,3                    | 0,2  | 0,313                    | 0,003 | 160,76                                                 | 1,64  | 0,4406                                                | 0,0038 | 1,3985                                               | 0,0047 | 40,53                | 0,45 | 40,37              | 0,46 | 1,4477                                                       | 0,0051 |                          |
| POM1/XI      | 175,33        | 27,7                    | 0,1  | 0,079                    | 0,002 | 473,33                                                 | 5,60  | 0,4390                                                | 0,0042 | 1,3776                                               | 0,0048 | 41,13                | 0,50 | 41,07              | 0,50 | 1,4244                                                       | 0,0052 |                          |
| POM 1 / II   | 226,67        | 27,7                    | 0,2  | 0,386                    | 0,004 | 104,84                                                 | 1,52  | 0,4777                                                | 0,0063 | 1,4225                                               | 0,0040 | 43,73                | 0,71 | 43,46              | 0,72 | 1,4794                                                       | 0,0045 |                          |
| POM 1 / I    | 228,33        | 20,9                    | 0,1  | 0,396                    | 0,004 | 80,09                                                  | 1,01  | 0,4955                                                | 0,0056 | 1,4684                                               | 0,0050 | 43,91                | 0,63 | 43,56              | 0,64 | 1,5324                                                       | 0,0056 |                          |
| POM 1 XXII   | 267,00        | 24,3                    | 0,1  | 0,239                    | 0,003 | 149,77                                                 | 1,29  | 0,4825                                                | 0,0035 | 1,3771                                               | 0,0031 | 46,11                | 0,43 | 45,92              | 0,43 | 1,4304                                                       | 0,0034 |                          |
| POM 1 XXIII  | 289,00        | 26,4                    | 0,1  | 0,236                    | 0,006 | 162,37                                                 | 1,71  | 0,4752                                                | 0,0042 | 1,3742                                               | 0,0036 | 45,38                | 0,51 | 45,20              | 0,51 | 1,4262                                                       | 0,0040 |                          |
| POM 1 / base |               | 33,2                    | 0,2  | 29,626                   | 0,162 | 2,47                                                   | 0,02  | 0,7209                                                | 0,0054 | 1,3700                                               | 0,0036 | 78,29                | 0,88 | 59,06              | 7,83 | 1,5708                                                       | 0,0819 | discarded from age model |



**Table S2.** Published <sup>14</sup>C ages of archaeological sequences included in Figure 3 and discussed in the text.

| site                              | map signature (Fig. S1) | stratigraphic position / layer | chronologic position in sequence | sample             | material | conventional 14C age, ka | ka, cal BP (p = 68%, INTCAL13), original calibration (c) / Bayesian model (m); recalibrated (r) | preceding layer, min age ka, cal BP (p = 68%) | lower layer boundary ka, cal BP (p = 68%) | upper layer boundary ka, cal BP (p = 68%) | succeeding layer, max age ka, cal BP (p = 68%) | Reference | original authors' artifact identification |
|-----------------------------------|-------------------------|--------------------------------|----------------------------------|--------------------|----------|--------------------------|-------------------------------------------------------------------------------------------------|-----------------------------------------------|-------------------------------------------|-------------------------------------------|------------------------------------------------|-----------|-------------------------------------------|
| Grotte du Rennes at Arcy-sur-Cure | c1                      | VII                            | oldest                           | EVA-95             | bone     | 34.81 ± 0.21             | 39.5 - 40.3 (m)                                                                                 |                                               |                                           |                                           |                                                | 15        | Protoaurignacian                          |
|                                   |                         | VIII                           | model transition VIII/VII        | Bayesian model age |          |                          | 40.7 - 41.4 (m)                                                                                 |                                               |                                           |                                           |                                                |           | Chatelperronian, low artifact density     |
|                                   |                         |                                | model transition IX/VIII         | Bayesian model age |          |                          | 41.2 - 41.6 (m)                                                                                 |                                               |                                           |                                           |                                                |           | Chatelperronian                           |
|                                   |                         | IX                             | youngest                         | EVA-29             | bone     | 35.50 ± 0.22             | 41.0 - 42.1 (m)                                                                                 |                                               |                                           |                                           |                                                |           |                                           |
|                                   |                         | summary VIII                   |                                  |                    |          |                          |                                                                                                 | 41.0                                          | 41.6                                      | 40.7                                      | 40.3                                           |           |                                           |
| Saint Cesaire                     | c2                      | ejo sup                        |                                  | n.a.               |          |                          | n.a.                                                                                            |                                               |                                           |                                           |                                                | 16        | Aurignacian 0                             |
|                                   |                         | ejoj sup / ejo inf             | model transition                 | Bayesian model age |          |                          | 39.7 - 41.1 (m)                                                                                 |                                               |                                           |                                           |                                                |           | sterile (ejo inf)                         |
|                                   |                         | ejoj sup                       | youngest                         | OxA-21699          | bone     | 36.00 ± 0.70             | 40.3 - 41.3 (m)                                                                                 |                                               |                                           |                                           |                                                |           | Chatelperronian                           |
|                                   |                         | summary ejo inf                |                                  |                    |          |                          |                                                                                                 | 41.3                                          | 41.1                                      | 39.7                                      | n.a.                                           |           |                                           |
| Les Cottés                        | c3                      | 4                              | oldest                           | S-EVA 9713         | bone     | 35.15 ± 0.28             | 39.3 - 40.0                                                                                     |                                               |                                           |                                           |                                                | 17        | Protoaurignacian                          |
|                                   |                         | 5/4                            | upper boundary                   | Bayesian model age |          |                          | 39.5 - 40.3 (m)                                                                                 |                                               |                                           |                                           |                                                |           | sterile (layer 5)                         |
|                                   |                         | 6/5                            | lower boundary                   | Bayesian model age |          |                          | 40.8 - 41.6 (m)                                                                                 |                                               |                                           |                                           |                                                |           | Chatelperronian                           |
|                                   |                         | 6                              | youngest                         | S-EVA 13666        | bone     | 36.23 ± 0.21             | 41.3 - 41.7 (m)                                                                                 |                                               |                                           |                                           |                                                |           |                                           |
|                                   |                         | summary 5                      |                                  |                    |          |                          | 41.3                                                                                            | 41.6                                          | 39.5                                      | 40.0                                      |                                                |           |                                           |
| Europe                            | -                       |                                |                                  | Bayesian age model |          |                          | 40.0 - 40.8                                                                                     |                                               | 40.8                                      | 40.0                                      |                                                | 16        | Neanderthal disappearance                 |
| Labeko Koba                       | b1                      | VII                            | oldest                           | OxA-21766          | bone     | 36.85 ± 0.80             | 41.0 - 41.6 (m)                                                                                 |                                               |                                           |                                           |                                                | 18        | Protoaurignacian                          |
|                                   |                         | VIII / VII                     | upper boundary                   | Bayesian model age |          |                          | 41.4 - 42.0 (m)                                                                                 |                                               |                                           |                                           |                                                |           | sterile                                   |
|                                   |                         | VIII                           |                                  | n.a.               |          |                          |                                                                                                 |                                               |                                           |                                           |                                                |           |                                           |
|                                   |                         | IX-upper                       | youngest                         | OxA-21972          | bone     | 36.55 ± 0.75             | 41.6 - 42.1 (m)                                                                                 |                                               |                                           |                                           |                                                |           |                                           |
|                                   |                         | IX-upper                       | oldest                           | OxA-23199          | bone     | 38.40 ± 0.90             | 41.7 - 42.2 (m)                                                                                 |                                               |                                           |                                           |                                                |           |                                           |
|                                   |                         | IX-lower / IX-upper            | lower boundary                   |                    |          |                          | 41.9 - 42.4 (m)                                                                                 |                                               |                                           |                                           |                                                |           |                                           |
|                                   |                         | IX-lower                       | youngest                         | OxA-22560          | bone     | 37.40 ± 0.80             | 42.2 - 42.6 (m)                                                                                 |                                               |                                           |                                           |                                                |           | Chatelperronian                           |
|                                   |                         | summary IX-upper               |                                  |                    |          |                          | 42.2                                                                                            | 42.2                                          | 41.6                                      | 41.6                                      |                                                |           |                                           |

**Table S2 continued.** Published <sup>14</sup>C ages of archaeological sequences included in Figure 3 and discussed in the text.

| site             | map signature (Fig. S1) | stratigraphic position / layer | chronologic position in sequence | sample                       | material                             | conventional <sup>14</sup> C age, ka | ka, cal BP (p = 68%, INTCAL13), original calibration (c) / Bayesian model (m); recalibrated (r) | preceding layer, min age ka, cal BP (p = 68%) | lower layer boundary ka, cal BP (p = 68%) | upper layer boundary ka, cal BP (p = 68%) | succeeding layer, max age ka, cal BP (p = 68%) | Reference | original authors' artifact identification |
|------------------|-------------------------|--------------------------------|----------------------------------|------------------------------|--------------------------------------|--------------------------------------|-------------------------------------------------------------------------------------------------|-----------------------------------------------|-------------------------------------------|-------------------------------------------|------------------------------------------------|-----------|-------------------------------------------|
| Abric Romani     | b2                      | A                              | oldest                           | OxA-X-2095-46                | shell                                | 36.09 ± 0.23                         | 41.3 - 41.7 (m)                                                                                 |                                               |                                           |                                           |                                                | 19        | Aurignacian 0                             |
|                  |                         | AR3/AR6                        | av. U-series                     | Bayesian model age           |                                      |                                      | 41.6 - 42.6 (U-Th age)                                                                          |                                               |                                           |                                           |                                                |           | sterile                                   |
|                  |                         | B                              | youngest                         | OxA-12025                    | shell                                | 39.06 ± 0.35                         | 42.8 - 43.5 (m)                                                                                 |                                               |                                           |                                           |                                                |           | Mousterian                                |
|                  |                         | summary AR3/AR6                |                                  |                              |                                      |                                      |                                                                                                 | 42.8                                          | 42.8                                      | 41.7                                      | 41.7                                           |           |                                           |
| Sesselfelsgrötte | a1                      | E3                             |                                  | GrN-7153                     | charcoal                             | 37.1 ± 1.1                           | 40.7 - 42.3 (r)                                                                                 |                                               |                                           |                                           |                                                | 20        | MMO                                       |
|                  |                         | G1                             |                                  | GrN-6848                     | charcoal                             | 41.84 ± 1.10                         | 44.2 - 46.2 (r)                                                                                 |                                               |                                           |                                           |                                                |           | Mousterian                                |
|                  |                         | G1                             |                                  | GrN-20302                    | bone                                 | 39.95 ± 0.92                         | 42.9 - 44.4 (r)                                                                                 |                                               |                                           |                                           |                                                |           |                                           |
|                  |                         | G1                             |                                  | GrN-20303                    | bone                                 | 41.37 ± 1.06                         | 43.6 - 45.7 (r)                                                                                 |                                               |                                           |                                           |                                                |           |                                           |
|                  |                         | G1                             |                                  | GrN-21528                    | combined bone from GrN-20302 & 20303 | 41.39 ± 0.58                         | 44.3 - 45.4 (r)                                                                                 |                                               |                                           |                                           |                                                |           |                                           |
|                  |                         | summary F                      |                                  |                              |                                      |                                      |                                                                                                 | 44.3                                          | n.a                                       | n.a                                       | 42.3                                           |           |                                           |
| Keilberg         | a2                      | layer 2, base                  |                                  | KN-4690                      | charcoal                             | 37.50 ± 1.45                         | 40.5 - 42.9 (r)                                                                                 |                                               |                                           |                                           |                                                | 21        | Aurignacian                               |
|                  |                         |                                |                                  | KN-4691                      | charcoal                             | 37.50 ± 1.25                         | 40.7 - 42.8 (r)                                                                                 |                                               |                                           |                                           |                                                |           |                                           |
|                  |                         |                                |                                  | KN-4692                      | charcoal                             | 38.6 ± 1.20                          | 41.7 - 43.6 (r)                                                                                 |                                               |                                           |                                           |                                                |           |                                           |
| Geissenklösterle | a3                      | 16                             | oldest                           | OxA-21722                    | bone                                 |                                      | 41.8 - 42.7 (m)                                                                                 |                                               |                                           |                                           |                                                | 22        | Early Aurignacian                         |
|                  |                         | 17/16                          | upper boundary                   |                              |                                      |                                      | 42.4 - 43.7 (m)                                                                                 |                                               |                                           |                                           |                                                |           | sterile                                   |
|                  |                         | 17                             |                                  | OxA-21658                    | bone                                 |                                      | 42.4 - 43.3 (m)                                                                                 |                                               |                                           |                                           |                                                |           |                                           |
|                  |                         | 17                             |                                  | OxA-21657                    | bone                                 |                                      | 42.4 - 43.4 (m)                                                                                 |                                               |                                           |                                           |                                                |           |                                           |
|                  |                         | 18/17                          | lower boundary                   |                              |                                      |                                      | 42.5 - 44.8 (m)                                                                                 |                                               |                                           |                                           |                                                |           |                                           |
|                  |                         | 18                             | youngest                         | OxA-21720                    | bone                                 |                                      | 42.5 - 44.5 (m)                                                                                 |                                               |                                           |                                           |                                                |           | Mousterian                                |
| summary 17       |                         |                                |                                  |                              |                                      | 42.5                                 | 43.4                                                                                            | 42.4                                          | 42.7                                      |                                           |                                                |           |                                           |
| Riparo Mochi     | a4                      | G                              | oldest                           | Rome-2                       | charcoal                             | 37.4 ± 1.3                           | 41.4 - 42.3 (m)                                                                                 |                                               |                                           |                                           |                                                | 23        | Protoaurignacian                          |
|                  |                         | transition H/G                 | range                            | Bayesian model age           |                                      |                                      | 41.6 - 42.8 (m)                                                                                 |                                               |                                           |                                           |                                                |           | sterile                                   |
|                  |                         | transition I/H                 | range                            | Bayesian model age           |                                      |                                      | 41.8 - 44.0 (m)                                                                                 |                                               |                                           |                                           |                                                |           | Mousterian                                |
|                  |                         | summary H                      |                                  |                              |                                      |                                      |                                                                                                 | n.a.                                          | 44.0                                      | 41.6                                      | 42.2                                           |           |                                           |
| Willendorf       | 5/a5                    | C8.2                           |                                  | average of 9 OxA & GrA dates | charcoal                             |                                      | 41.7 - 42.9 (c)                                                                                 |                                               |                                           |                                           |                                                | 24        | Early Aurignacian                         |
|                  |                         | C9                             |                                  | n.a.                         |                                      |                                      | n.a.                                                                                            |                                               |                                           |                                           |                                                |           | IUP                                       |
|                  |                         | D1                             |                                  | average of 9 OxA & GrA dates | charcoal                             |                                      | 43.9 - 46.6 (c)                                                                                 |                                               |                                           |                                           |                                                |           |                                           |
|                  |                         | summary C9                     |                                  |                              |                                      |                                      |                                                                                                 |                                               | 43.9                                      | 42.9                                      |                                                |           |                                           |

## References

1. Onac BP, Drăgușin V, Papiu F, Theodorescu C-T (2019) Rodna Mountains: Izvorul Tăusoarelor Cave (Pestera de la Izvorul Tăusoarelor). *Cave and Karst Systems of Romania*, eds Ponta GML, Onac BP (Springer International, Cham), pp 47–56.
2. Onac BP, White WB, Viehmann I (2001) Leonite  $[K_2Mg(SO_4)_2 \cdot 4H_2O]$ , konyaite  $[Na_2Mg(SO_4)_2 \cdot 5H_2O]$  and syngenite  $[K_2Ca(SO_4)_2 \cdot H_2O]$  from Tăusoare Cave, Rodnei Mts, Romania. *Min Mag* 65(1):103–109.
3. Drăgușin V, Vlaicu M, Isverceanu E (2019) Mehedinti Mountains: The Cave from Mohilii Creek (Ascunsă Cave). *Cave and Karst Systems of Romania*, eds Ponta GML, Onac BP (Springer International, Cham), pp 171–173.
4. Hoffmann D, et al. (2007) Procedures for accurate U and Th isotope measurements by high precision MC-ICPMS. *Int J Mass Spec* 264(2-3): 97–109.
5. Scholz D, Hoffmann DL (2011) StalAge – An algorithm designed for construction of speleothem age models. *Quat Geochronol* 6(3–4):369–382.
6. Dragusin V, et al. (2017) Transfer of environmental signals from the surface to the underground at Ascunsă Cave, Romania. *Hydrol Earth Syst Sci* 21(10):5357–5373.
7. Drăgușin V, et al. (2014) Constraining Holocene hydrological changes in the Carpathian–Balkan region using speleothem  $\delta^{18}O$  and pollen-based temperature reconstructions. *Clim Past* 10(4):1363–1380.
8. Rasmussen SO, et al. (2014) A stratigraphic framework for abrupt climatic changes during the Last Glacial period based on three synchronized Greenland ice-core records: refining and extending the INTIMATE event stratigraphy. *Quat Sci Rev* 106:14–28.
9. Kindler P, et al. (2014) Temperature reconstruction from 10 to 120 kyr b2k from the NGRIP ice core. *Clim Past* 10(2):887–902.
10. Almogi-Labin A, et al. (2009) Climatic variability during the last ~90ka of the southern and northern Levantine Basin as evident from marine records and speleothems. *Quat Sci Rev* 28:2882–2896.
11. Hofer D, et al. (2012) Simulated winter circulation types in the North Atlantic and European region for preindustrial and glacial conditions: Glacial Circulation Types. *Geophys Res Lett* 39(15): DOI 10.1029/2012GL052296.
12. Rowe PJ et al. (2012) Speleothem isotopic evidence of winter rainfall variability in northeast Turkey between 77 and 6 ka. *Quat Sci Rev* 45:60–72.
13. Obrecht I, et al. (2017) Shift of large-scale atmospheric systems over Europe during late MIS 3 and implications for Modern Human dispersal. *Sci Rep* 7:5848.
14. Ryan, W.B.F, et al (2009) Global Multi-Resolution Topography synthesis, *Geochem. Geophys. Geosyst.*, 10, Q03014, doi:10.1029/2008GC002332.
15. Hublin J-J, et al. (2012) Radiocarbon dates from the Grotte du Renne and Saint-Césaire support a Neanderthal origin for the Châtelperronian. *Proc Natl Acad Sci U S A* 109(46):18743–18748.
16. Higham T, et al. (2014) The timing and spatiotemporal patterning of Neanderthal disappearance. *Nature* 512(7514):306–309.
17. Talamo S, et al. (2012) A radiocarbon chronology for the complete Middle to Upper Palaeolithic transitional sequence of Les Cottés (France). *J Archaeol Sci* 39(1):175–183.
18. Wood RE, et al. (2014) The chronology of the earliest Upper Palaeolithic in northern Iberia: New insights from L'Arbreda, Labeko Koba and La Vina. *J Hum Evol* 69:91–109.
19. Camps M, Higham T (2012) Chronology of the Middle to Upper Palaeolithic transition at Abric Romani, Catalunya. *J Hum Evol* 62(1):89–103.
20. Böhner U (2008) Sesselfelsgrotte IV - Die Schicht E3 der Sesselfelsgrotte und die Funde am Abri Schulerloch (Franz Steiner Verlag Stuttgart, Germany).
21. Uthmeyer T (1996) Ein bemerkenswert frühes Inventar des Aurignacien von der Freilandfundstelle “Keilberg-Kirche” bei Regensburg. *Archaeologisches Korrespondenzblatt* 26:233–248.
22. Higham T, et al. (2012) Testing models for the beginnings of the Aurignacian and the advent of figurative art and music: The radiocarbon chronology of Geißenklösterle. *J Hum Evol* 62(6):664–676.
23. Douka K, et al. (2012) A new chronostratigraphic framework for the Upper Palaeolithic of Riparo Mochi (Italy). *J Hum Evol* 62(2):286–299.
24. Nigst PR, et al. (2014) Early modern human settlement of Europe north of the Alps occurred 43,500 years ago in a cold steppe-type environment. *Proc Natl Acad Sci* 111(40):14394–14399.
